# Supplementary material
Source: Springer Nature journal article supplement (https://www.springermedizin.de/resource/supplementary/12958_2007_419_MOESM8_ESM.pdf/9567838)

20

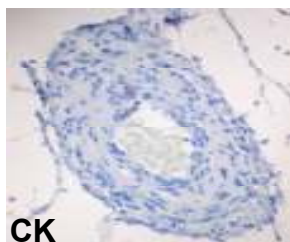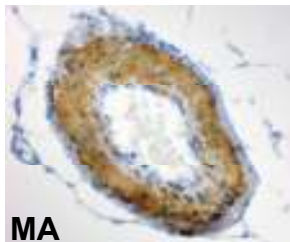

40

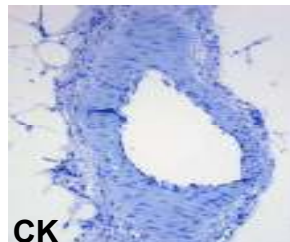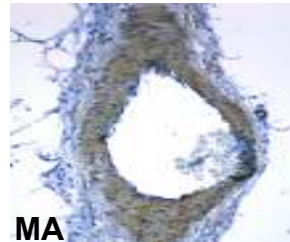

60

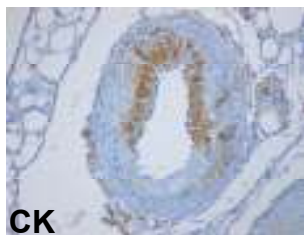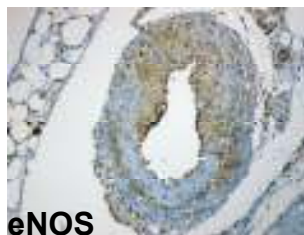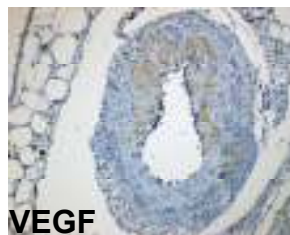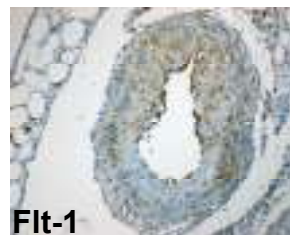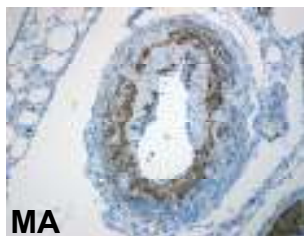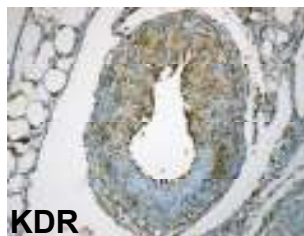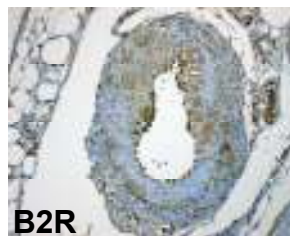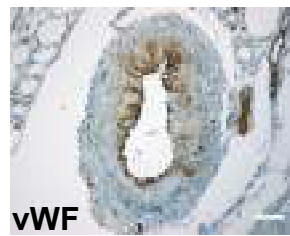

Supplement: MOESM8 [file 9567838]
